# Supplementary material
Source: HighWire-hosted journal article supplement (https://jnm.snmjournals.org/highwire/filestream/95210/field_highwire_adjunct_files/0/194555_Supplemental_Data.pdf)
Supplement: 194555_Supplemental_Data.pdf [file 194555_Supplemental_Data.pdf]

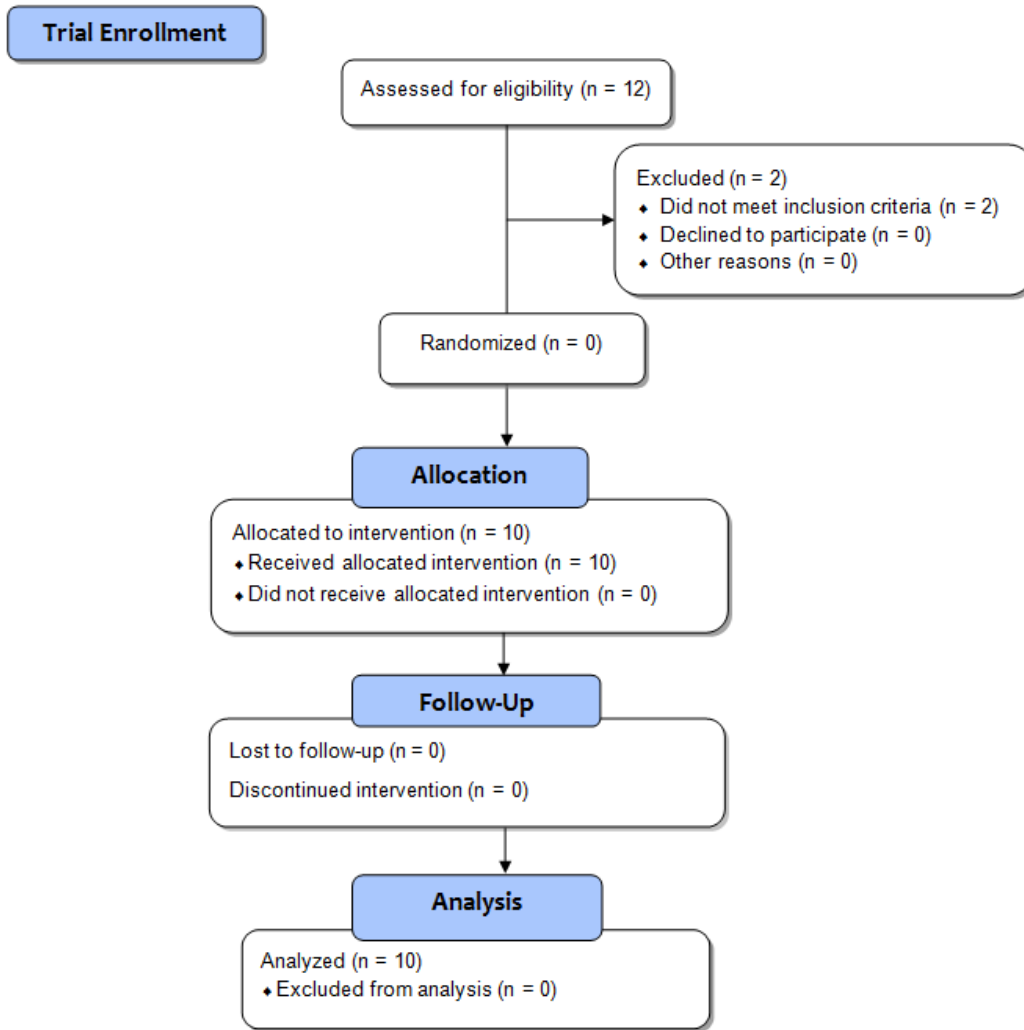

**SUPPLEMENTAL FIGURE 1.** CONSORT diagram for *Pilot Trial of PET Imaging with <sup>89</sup>Zr-DFO-Trastuzumab in Esophagogastric Cancer*. All patients in cohort 1.

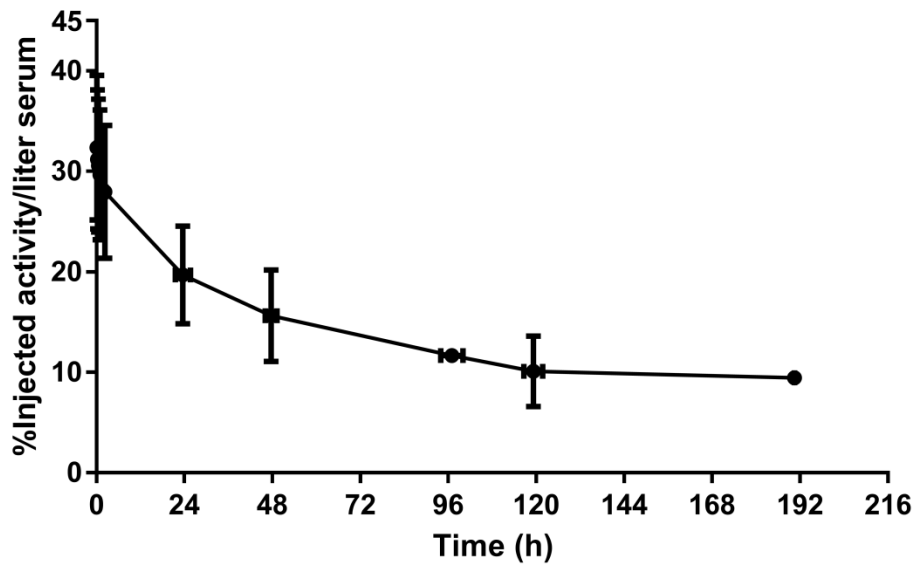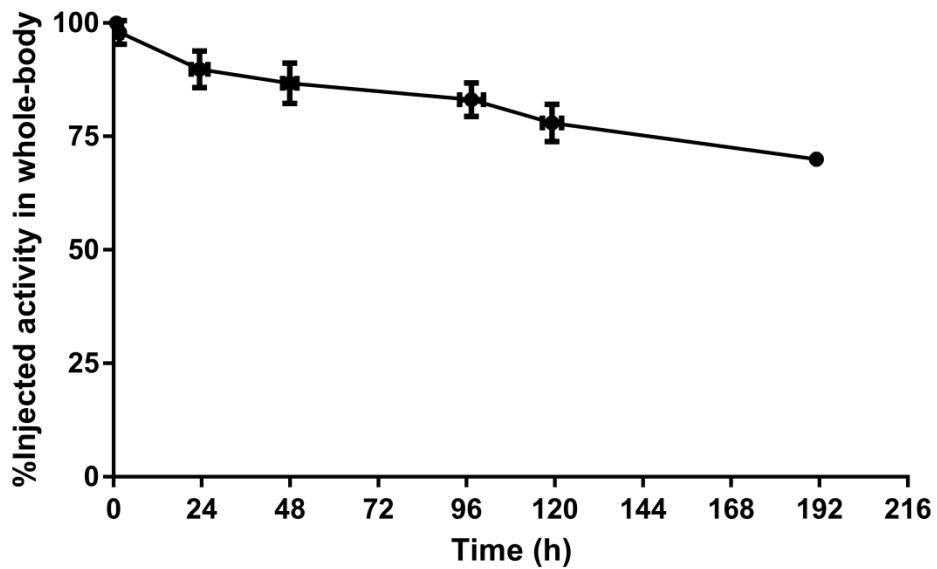

**SUPPLEMENTAL FIGURE 2.** The concentration of  $^{89}\text{Zr}$ -trastuzumab in serum was determined by counting serum samples in a gamma well counter from 10 patients (upper panel). The average serum concentration (%IA/L)  $\pm$  SD was

plotted against time (h)  $\pm$  SD. Initially, most of the entire injected activity was present in the serum, which cleared with a median T1/2 of 111 h. Whole-body clearance of activity was determined by using serial probe measurement (lower panel). The initial probe measurement was done after injection of  $^{89}\text{Zr}$ -trastuzumab and prior to voiding, and thus represented 100% of the injected activity. Whole-body retention was prolonged with a median T1/2 378 h. At a mean of 120 h, there was a mean retention of 70-83% of the injected activity in the whole body.

| Patient | Tumor 1  | Tumor 2 | Tumor 3 | Tumor 4 | Tumor 5 | Time of last trastuzumab therapy prior to <sup>89</sup> Zr-trastuzumab (days) |
|---------|----------|---------|---------|---------|---------|-------------------------------------------------------------------------------|
| 1       | 19.3     | 12.8    | 7.3     | 5.4     |         | -71                                                                           |
| 2       | 10.5     | 8.3     | 8.1     | 6.4     | 6.1     | -42                                                                           |
| 3       | Negative |         |         |         |         | Naïve                                                                         |
| 4       | Negative |         |         |         |         | -35                                                                           |
| 5       | 3.2      | 3.0     | 2.9     | 2.2     | 2.2     | -15                                                                           |
| 6       | 8.3      | 7.5     | 7.0     | 6.2     | 3.9     | -106                                                                          |
| 7       | 7.2      | 5.8     | 4.0     |         |         | -41                                                                           |
| 8       | 3.1      | 2.9     |         |         |         | Naïve                                                                         |
| 9       | 13.5     | 12.6    | 12.5    | 10.9    | 8.4     | Naïve                                                                         |
| 10      | 22.7     | 11.6    | 10.8    | 9.8     | 9.2     | -156                                                                          |

**SUPPLEMENTAL TABLE 1.** Highest <sup>89</sup>Zr-trastuzumab SUV<sub>LBMmax</sub> uptake in up to 5 lesions identified per patient and demonstrated heterogeneity in the degree of tumor uptake. Patients 3 and 4 had no localization in any of their known tumor sites. The last column indicates the number of days from the last cold trastuzumab therapy to injection of <sup>89</sup>Zr-trastuzumab.
